# Supplementary material for: Anion induced displacement studies in naphthalene diimide containing interpenetrated and interlocked structures
Source: Royal Society of Chemistry journal article supplement (doi:10.1039/b819322c), 2009-01-01
Supplement: b819322c.pdf [file b819322c.pdf]

## Supplementary Material

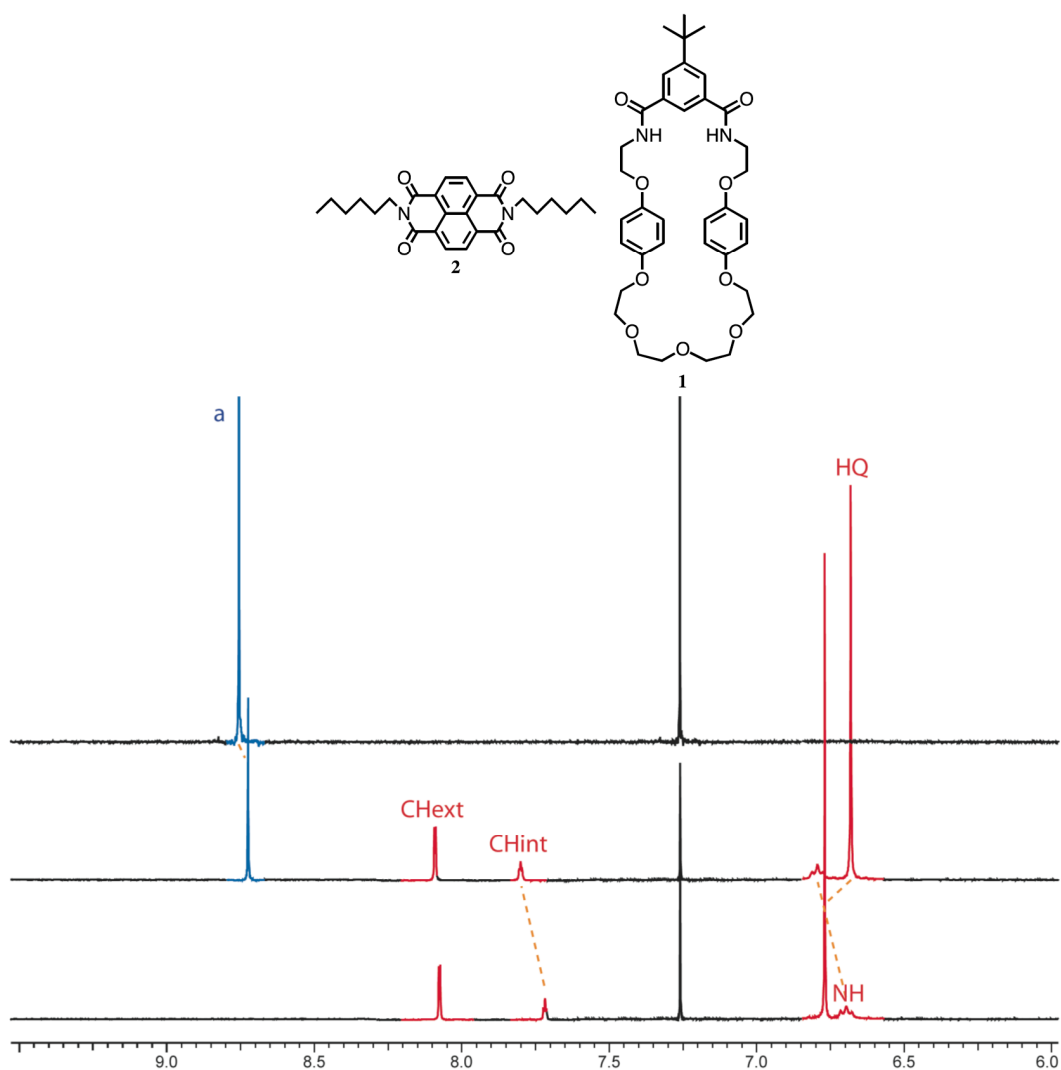

**Figure S1:** - <sup>1</sup>H NMR binding study in CDCl<sub>3</sub> (top spectrum is of diimide **2**, the middle spectrum is a 1:1 mixture of **2** and **1**, and the bottom spectrum is of macrocycle **1**).

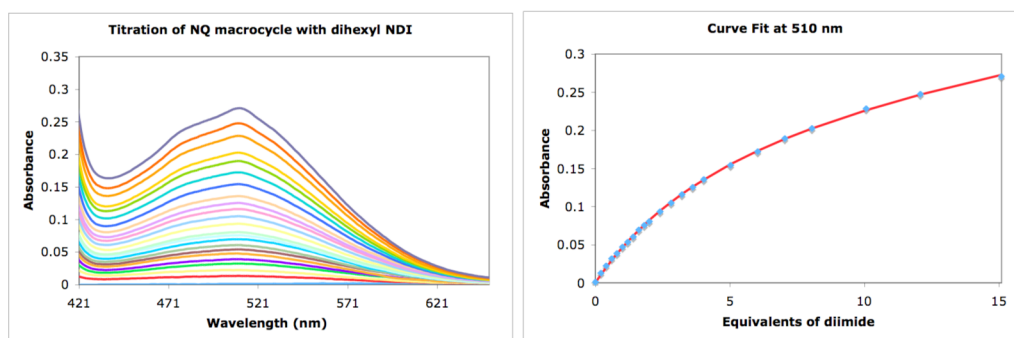

**Figure S2:** - UV titration of macrocycle **8** with a solution of naphthalene diimide **2** in CHCl<sub>3</sub>.

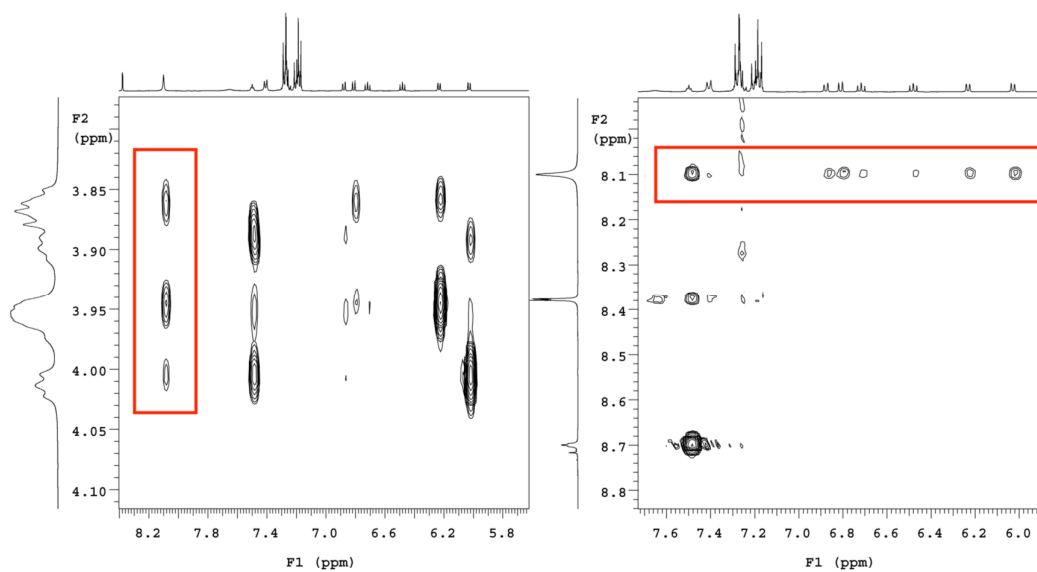

**Figure S3:-** ROESY spectrum of diimide rotaxane **11** in CD<sub>2</sub>Cl<sub>2</sub>. Left spectrum highlights the diimide ROESY interactions with the ethoxy protons in the macrocycle. The right spectrum clearly shows ROESY interactions from the diimide proton to all of the naphthohydroquinone protons in the macrocycle and the NH protons in the macrocycle.
